# Supplementary material
Source: HighWire-hosted journal article supplement (https://erj.ersjournals.com/content/57/4/1901192)
Supplement: inline-supplementary-material-1 [file inline-supplementary-material-1.pdf]

# **CILP1 as a biomarker for right ventricular maladaptation in pulmonary hypertension**

Supplementary material

**Suppl. Figure S1: Box plots comparing (A) CILP1 and (B) ANP protein concentrations in murine RV one week after sham, mild PAB, and severe PAB**

Data were obtained from quantitative western blot band intensity analysis

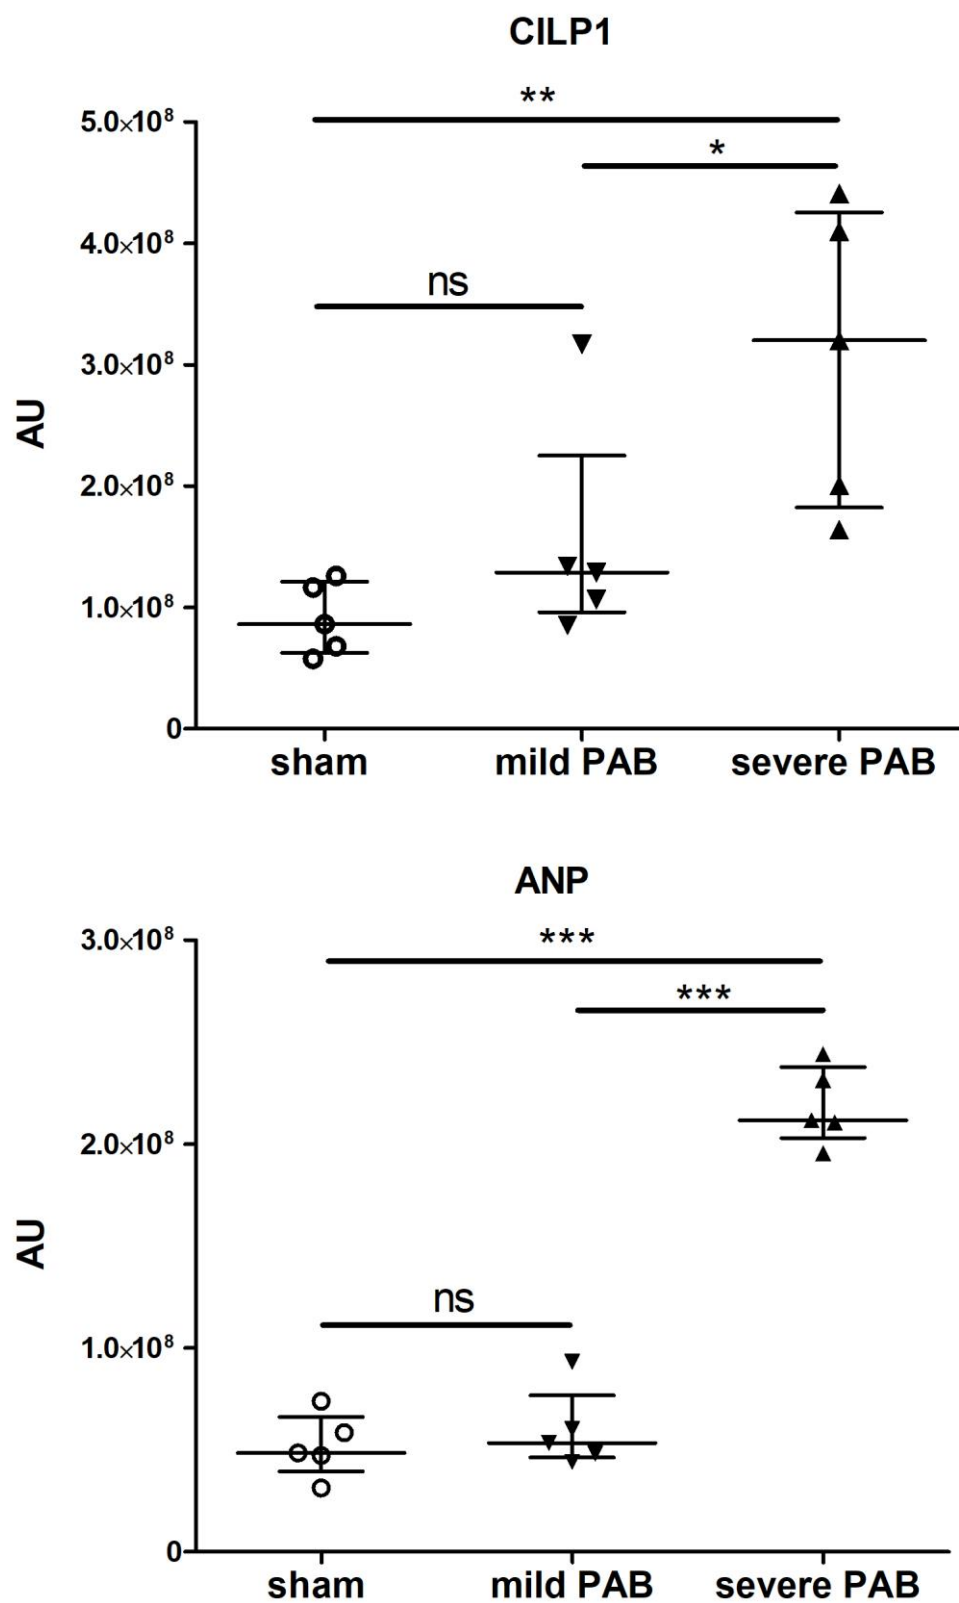

**Suppl. Figure S2: Box plots comparing the amount of collagen I (A) and III (B) in murine RV one week after sham and severe PAB.**

Data were obtained from quantitative immunofluorescence measurements are expressed as percent of the signal per tissue area. Boxes represent median with IQR. (n=4 in each group, \*\*\*p<0.001)

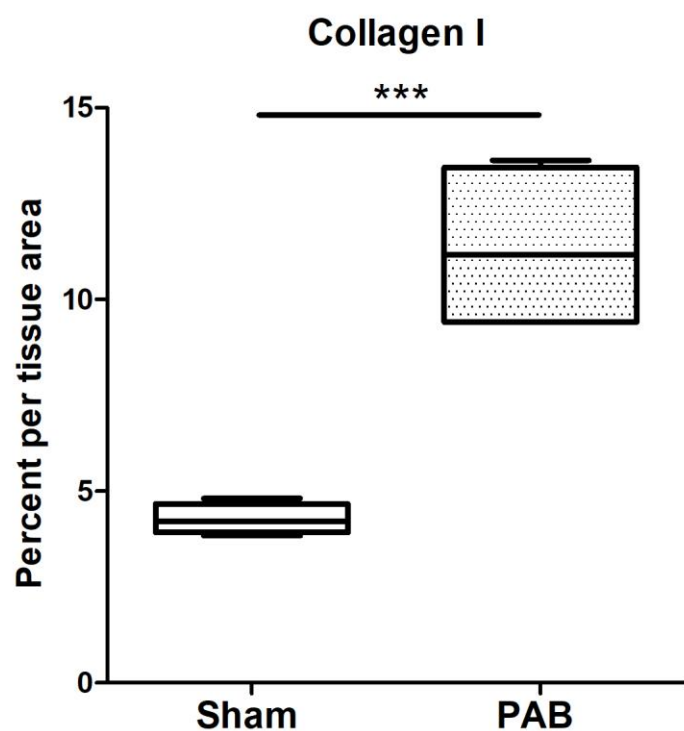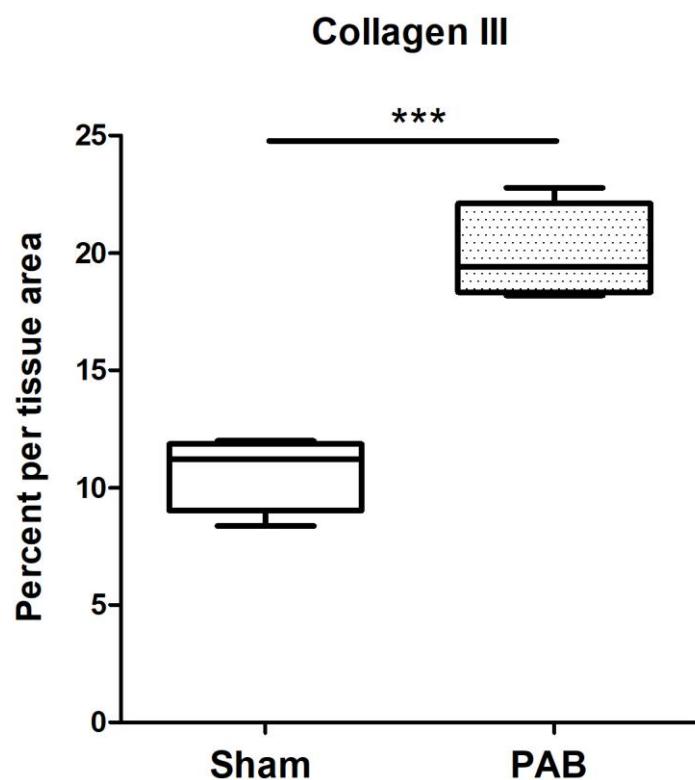

**Suppl. Figure S3: Analysis of CILP1, COL1A1, COL1A2, COL3A1, COL8A1, POSTN, and FN1 expression in human cardiac fibroblasts under stimulation with (A) transforming growth factor beta 1 (TGF $\beta$ 1, 5 ng/ml), or (B) fetal bovine serum for 6, 48 and 72 hours; (C) Correlation analysis between the gene expression levels of CILP1 and COL1A1, COL1A2, COL3A1, COL8A1, POSTN, and FN1 under TGF $\beta$ 1 at 72 hours.**

The gene expression levels of CILP1, COL1A1, COL1A2, COL3A1, COL8A1, POSTN, and FN1 were measured by real-time polymerase chain reaction (PCR). The data was normalized to the housekeeping gene hypoxanthine-guanine phosphoribosyltransferase (HPRT1) and untreated control (basal medium without addition of serum or TGF $\beta$ 1). The  $\Delta\Delta C_t$  values are expressed as mean (SD), (n=3, \*p < 0.05 versus basal medium)

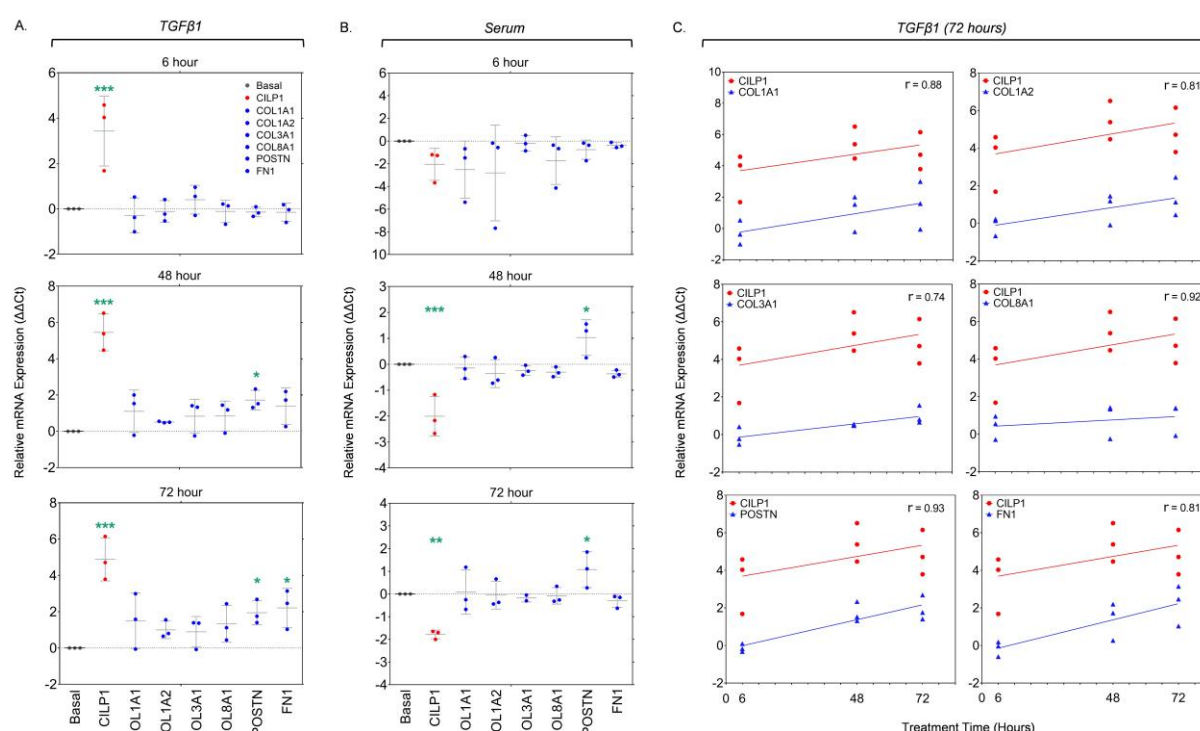

**Suppl. Table S1: Clinical characteristics of IPAH and CTEPH patients**

|                                                    | <b>Adaptive<br/>CTEPH<br/>n=22</b> | <b>Maladaptive<br/>CTEPH<br/>n=13</b> | <b>Adaptive<br/>IPAH<br/>n=25</b> | <b>Maladaptive<br/>IPAH<br/>n=37</b> |
|----------------------------------------------------|------------------------------------|---------------------------------------|-----------------------------------|--------------------------------------|
| Female sex, n (%)                                  | 10 (45)                            | 4 (31)                                | 16 (64)                           | 23 (62)                              |
| Age, y, median (IQR)                               | 67 (64-72)                         | 58 (53-63)                            | 60 (50-69)                        | 60 (41-71)                           |
| BMI, kg/m <sup>2</sup> , median (IQR)              | 24 (24-29)                         | 26 (26-28)                            | 29 (26-32)                        | 26 (22-30)                           |
| CAD, n (%)                                         | 4 (18)                             | 3 (23)                                | 4 (16)                            | 10 (28)                              |
| NYHA $\geq$ III, n (%)                             | 14 (74)                            | 6 (55)                                | 7 (58)                            | 15 (71)                              |
| Diabetes, n (%)                                    | 5 (23)                             | 2 (15)                                | 7 (28)                            | 10 (28)                              |
|                                                    |                                    |                                       |                                   |                                      |
|                                                    |                                    |                                       |                                   |                                      |
| <b>Right Heart Catheterization</b>                 |                                    |                                       |                                   |                                      |
| PASP, mmHg, median (IQR)                           | 56 (46-65)                         | 88 (70-93)                            | 64 (52-78)                        | 88 (77-105)                          |
| PAPmean, mmHg, median (IQR)                        | 36 (29-41)                         | 55 (44-58)                            | 40 (33-49)                        | 55 (48-65)                           |
| Cardiac index, L/min/m <sup>2</sup> , median (IQR) | 2,92 (2,76-3,30)                   | 1,86 (1,60-1,95)                      | 3,13 (2,80-3,33)                  | 1,70 (1,47-2,02)                     |
| PAWPmean, mmHg, median (IQR)                       | 8 (8-12)                           | 9 (8-11)                              | 10 (7-12)                         | 10 (7-12)                            |
| RAP, mmHg, median (IQR)                            | 5 (5-7)                            | 11 (6-16)                             | 5 (4-11)                          | 10 (8-13)                            |
|                                                    |                                    |                                       |                                   |                                      |
| <b>Echocardiography</b>                            |                                    |                                       |                                   |                                      |
| TAPSE, mm, median (IQR)                            | 23 (21-26)                         | 16 (11-16)                            | 22 (21-25)                        | 14 (12-16)                           |
| LVEF, median (IQR)                                 | 62 (59-67)                         | 60 (58-63)                            | 65 (60-71)                        | 65 (60-70)                           |
| RVD, mm, median (IQR)                              | 39,5 (33-45)                       | 49 (47-57)                            | 40 (37-44)                        | 50 (47-52)                           |
| IVSd, mm, median (IQR)                             | 10 (9-11)                          | 10 (9-12)                             | 9 (9-11)                          | 10 (9-11)                            |
| LVPWd, mm, median (IQR)                            | 9,5 (9-10)                         | 10 (9-10)                             | 9 (6-10)                          | 10 (10-11)                           |
|                                                    |                                    |                                       |                                   |                                      |
| <b>TAPSE/PASP</b>                                  | 0,40 (0,34-0,51)                   | 0,16 (0,14-0,21)                      | 0,35 (0,27-0,49)                  | 0,16 (0,13-0,21)                     |
| <b>CILP1, pg/ml, median (IQR)</b>                  | 3426 (2872-3812)                   | 5643 (5053-6008)                      | 4092 (2720-4687)                  | 5764 (4375-6341)                     |
| <b>NT-pro-BNP, pg/ml, median (IQR)</b>             | 193 (95-367)                       | 1138 (999-2197)                       | 70 (39-133)                       | 573 (209-1488)                       |
|                                                    |                                    |                                       |                                   |                                      |

Abbreviations: BMI body mass index; CAD, coronary artery disease; NYHA, New York Heart Association; PASP pulmonary arterial systolic pressure; PAPmean, mean pulmonary artery pressure; PAWPmean, mean pulmonary artery wedge pressure; RAP right atrial pressure; TAPSE, tricuspid annular plane systolic excursion; LVEF, left ventricular ejection fraction; RVD, right ventricular diameter; IVSd, diastolic interventricular septum thickness, LVPWd, diastolic left ventricular posterior wall thickness

**Suppl. Table S2: Multivariable analysis of parameters as predictors of high serum CILP concentration**

| <b>Variable</b> | <b>p-value</b> | <b>Odds Ratio</b> | <b>95 CI</b> |
|-----------------|----------------|-------------------|--------------|
| PAPmean         | 0.39           | 0.98              | 0.92-1.03    |
| RVD             | 0.13           | 1.06              | 0.98-1.13    |
| TAPSE/PASP      | 0.01           | 0.08              | 0.01-0.52    |

Abbreviations: PAPmean, mean pulmonary artery pressure; RVD, right ventricular diameter; TAPSE, tricuspid annular plane systolic excursion; PASP pulmonary arterial systolic pressure
